# Supplementary material for: Molecular Epidemiology of Group B Streptococci in Lithuania Identifies Multi-Drug Resistant Clones and Sporadic ST1 Serotypes Ia and Ib
Source: Pathogens. 2022 Sep 17;11(9):1060. doi: 10.3390/pathogens11091060 (PMC9504518; doi:10.3390/pathogens11091060)
Supplement: Supplementary file 1 [file pathogens-11-01060-s001.zip › Supp_tables_final.xlsx]

## Sheet: Table S1
Table S1. Summary of the genomic, demographic, and phenotypic characteristics of GBS isolates from Lithuania. This table summarises information on 42 GBS isolates from Lithuania collected between July and September 2020. Clonal Complexes (CC) were assigned using the PubMLST database. The presence of acquired antimicrobial resistance genes is indicated with the gene name. Specific amino acid chang…
		Metadata						Genotypic AMR data							Antimicrobial susceptibility testing results				Surface genes
GBS isolate ID	Raw reads accession number	Patient age group	Pregnancy	Sample type	Serotype	Genotype (MLST)	CC	Tetracyclines resistantace genes	Macrolides resistance genes	Amynoglycosides resistance genes	pbp1a	pbp2X	gyrA	parC	PEN	ERY	CLIN	TRIM-SUL	alpha-C	alp1	alp2/3	rib	srr1	srr2	PI-1	PI-1B	PI-2A1	PI-2A2	PI-2A3	PI-2A4	PI-2B	PI-2B2	hvgA
LTS001	ERR10167971	30-34	Y	Vaginal swab	III	ST1865	CC17	tetM			S473N	I342V, G592V		G128D,A664V					0.709			1		1	1						1		1
LTS003	ERR10167954	25-29	Y	Vaginal swab	III	ST1339	CC17	tetM			S473N	I342V, G592V		G128D, A664V	S (20mm)	S (21mm)	S (18mm)		0.709			1		1	1						1		0.995
LTS007	ERR10167955	NA	Y	Vaginal swab	Ia	ST88	CC23					I342V, V475I							0.783		99%/99%		1		1				1
LTS009	ERR10167956	25-29	Y	Vaginal swab	V	ST529	CC327	tetO					D307A, E371G	S739F	S (20mm)	S (23mm)	S (20mm)		0.709			1			1			1
LTS010	ERR10167957	30-34	Y	Vaginal swab	Ia	ST23	CC23	tetM				I342V, V475I			S (19mm)	R (16mm)	S (17mm)		0.807	0.996			1				1
LTS011	ERR10170174	30-34	Y	Vaginal swab	III	ST17	CC17	tetO	ermB	ant6-Ia, aph(3'')-III	S473N	I342V, G592V		G128D, A664V	S (23mm)	R (7mm)	R (7mm)		0.709			1		1							1		1
LTS014	ERR10170175	30-34	Y	Vaginal swab	Ia	ST144	CC23	tetM				I342V, V475I			S (24mm)	S (23mm)	S (17mm)		0.713			0.996	1				1
LTS017	ERR10170176	NA	N	Vaginal swab	V	ST498	CC452	tetM				I342V, V475I		N639S, D641E, S690R	S (25mm)	S (27mm)	S (24mm)	S (25mm)	1	0.809	0.786	0.709	1				1
LTS018	ERR10170177	30-34	Y	Vaginal swab	Ia	ST1	CC1	tetM					I486V	D810G	S (22mm)	S (23mm)	S (20mm)		0.785		1		0.973		1						1
LTS025	ERR10170178	35-39	N	Vaginal swab	V	ST498	CC452	tetM				I342V, V475I		N639S, D641E,S690R	S (23mm)	S (21mm)	S (20mm)	S (23mm)	1	0.809	0.786	0.709	1				1
LTS026	ERR10170179	35-39	Y	Vaginal swab	III	ST17	CC17	tetM							S (20mm)	S (21mm)	S (20mm)		0.709			1		1	1						1		1
LTS027	ERR10170180	35-39	Y	Vaginal swab	Ia	ST88	CC23					I342V, V475I							0.783		99%/99.6%		1		1				1
LTS028	ERR10170181	30-34	Y	Vaginal swab	V	ST1	CC1	tetM					D307A, E371G	E812G	S (22mm)	S (22mm)	S (20mm)		0.785		1		0.973		1		1
LTS031	ERR10170182	NA	N	Vaginal swab	V	ST890	CC452	tetM	ermB	ant6-Ia, aph(3'')-III		I342V, V475I		N639S, D641E, S690R	S (22mm)	R (6mm)	R (6mm)	S (20mm)	1	0.809	0.786	0.709	1				1
LTS034	ERR10170183	25-29	Y	Vaginal swab	Ia	ST1866	CC12	tetM					D307A, E371G	T421I, E812G	S (23mm)	S (26mm)	S (25mm)		1	0.809	0.786	0.709	1		1		1
LTS035	ERR10170184	30-34	Y	Vaginal swab	III	ST1867	CC17	tetM			S473N	I342V, G592V		G128D,A664V	S (24mm)	S (24mm)	S (24mm)		0.709			1		1	1						1		1
LTS036	ERR10170185	45-49	Y	Urine	III	ST335	CC19	tetM	ermA				D307A, E371G	S739F	S (28mm)			S (19mm)	0.709			1	0.993		1			1
LTS037	ERR10170186	25-29	Y	Urine	III	ST19	CC19	tetM			A576V		D307A, E371G	S739F					0.709			1	0.993		1			1
LTS038	ERR10170187	30-34	Y	Vaginal swab	Ia	ST88	CC23					I342V, V475I							0.783		99%/99.6%		1		1				1
LTS039	ERR10170188	35-39	Y	Vaginal swab	V	ST1	CC1	tetM	ermB		Y317F		D307A, E371G	E812G	S (20mm)	R (6mm)	R (6mm)		0.785		1		0.973		1		1
LTS040	ERR10170189	30-34	Y	Vaginal swab	III	ST17	CC17	tetM			S473N	I342V, G592V		G128D,A664V										1	1						1		1
LTS042	ERR10170190	25-29	Y	Vaginal swab	Ia	ST88	CC23					I342V, V475I			S (31mm)	S (27mm)	S (24mm)		0.783		99%/99.6%		1		1				1
LTS043	ERR10170191	15-19	Y	Vaginal swab	Ia	ST88	CC23					I342V, V475I			S (25mm)	S (24mm)	S (19mm)		0.783		99%/99.6%		1		1				1
LTS044	ERR10170192	>85	N	Blood	Ia	ST12	CC12	tetM					D307A, E371G	L449F	S (19mm)	S (21mm)	S (18mm)		1	0.809	0.783	0.709	1		1		1
LTS045	ERR10170193	30-34	Y	Vaginal swab	Ia	ST1387	CC1	tetM					D307A, E371G	N639S, D641E,S690R					0.723	0.998			0.973		1		1
LTS046	ERR10170194	35-39	Y	Vaginal swab	Ia	ST144	CC23	tetM				I342V, V475I							0.713			0.996	1				1
LTS047	ERR10170195	20-24	Y	Vaginal swab	Ia	ST23	CC23	tetM				I342V, V475I			S (24mm)	S (19mm)	S (17mm)		0.808	0.996			1				1
LTS048	ERR10170196	35-39	Y	Vaginal swab	III	ST17	CC17	tetM			S473N	I342V, G592V		G128D,A664V	S (18mm)	S (21mm)	S (17mm)		0.709			1		1	1						1		1
LTS049	ERR10170197	40-44	Y	Urine	III	ST335	CC19	tetM	ermA				D307A, E371G	S739F	S (23mm)			S (21mm)	0.709			1	0.993		1			1
LTS050	ERR10170198	NA	Y	Vaginal swab	III	ST861	CC19	tetO	lsaC				E371G, V489F	S739F	S (25mm)	S (27mm)	R (14mm)		0.709			1	0.993		1			1
LTS052	ERR10170199	35-39	N	Vaginal swab	V	ST1	CC1	tetM					D307A, E371G	E812G	S (21mm)	S (22mm)	S (20mm)	S (21mm)	0.785		1		0.973		1		1
LTS053	ERR10170200	35-39	Y	Vaginal swab	Ia	ST144	CC23	tetM				I342V, V475I							0.713			0.996	1				1
LTS055	ERR10170201	30-34	Y	Urine	V	ST1	CC1	tetM					D307A, E371G	E812G	S (24mm)		S (23mm)	S (18mm)	0.785		1		0.973		1		1
LTS057	ERR10170202	25-29	N	Vaginal swab	III	ST27	CC19	tetO					D307A, E371G	S739F	S (23mm)	S (25mm)	S (22mm)	S (22mm)	0.709			1			1			1
LTS058	ERR10170203	25-29	Y	Vaginal swab	Ia	ST144	CC23		lsaC			I342V, V475I							0.713			0.996	1				1
LTS060	ERR10170204	30-34	Y	Vaginal swab	Ia	ST144	CC23	tetM				I342V, V475I			S (25mm)	S (22mm)	S (20mm)		0.713			0.996	1				1
LTS061	ERR10170205	55-59	Y	Urine	V	ST498	CC452	tetM				I342V, V475I		N639S, D641E,S690R	S (27mm)			S (26mm)	1	0.809	0.786	0.709	1				1
LTS062	ERR10170206	40-44	Y	Vaginal swab	III	ST17	CC17	tetM			S473N	I342V, G592V		G128D,A664V					0.709			1		1	1						1		1
LTS064	ERR10170207	NA	Y	Urine	III	ST17	CC17	tetM, tetO	ermB		S473N	I342V, G592V		G128D,A664V	S (22mm)			S (20mm)	0.709			1		1							1		1
LTS065	ERR10170208	20-24	Y	Vaginal swab	Ia	ST23	CC23	tetM				I342V, V475I			S (29mm)	S (23mm)	S (21mm)		0.807	0.996			1				1
LTS066	ERR10170209	25-29	Y	Vaginal swab	Ib	ST1	CC1	tetM	ermB				D307A, E371G	D810G	S (24mm)	R (6mm)	R (6mm)		0.785		1		0.973		1		1
LTS067	ERR10170210	25-29	Y	Vaginal swab	Ia	ST88	CC23					I342V, V475I			S (25mm)	S (24mm)	S (22mm)		0.783		99%/99.6%		1		1				1

## Sheet: Table S2
Table S2. A list of nine serotype Ia ST1 genomes downloaded from the PubMLST database for comparison analysis with ST1 CC1 genomes from this study. Metadata reported as per information available on the PubMLST database.
Id	Accession numbers	Country	Year	Sample type	Capsular genotype	Sequence type
SRR5061241	SAMN06031366; SRS1824120	USA	2015	others	Ia	ST1
SRR5062418	SAMN06031690; SRS1825133	USA	2015	other	Ia	ST1
SRR7282673	SAMN09385559; SRS3397815	USA	2016	other	Ia	ST1
SRR7283501	SAMN09385067; SRS3398498	USA	2016	other	Ia	ST1
SRR7283561	SAMN09384738; SRS3398433	USA	2016	other	Ia	ST1
SRR7284080	SAMN09385987; SRS3398752	USA	2016	other	Ia	ST1
SRR7284114	SAMN09386016; SRS3399090	USA	2016	other	Ia	ST1
SRR7283940	SAMN09386187; SRS3398892	USA	2016	other	Ia	ST1
